# Supplementary material for: Rates and predictors of hospital readmission after transcatheter aortic valve implantation
Source: Oxford University Press journal article supplement (doi:10.1093/eurheartj/ehx182), 2017-03-24

# **RATES AND PREDICTORS OF HOSPITAL READMISSION AFTER TRANSCATHETER AORTIC VALVE IMPLANTATION**

Anna Franzone, Thomas Pilgrim, Nicolas Arnold, Dik Heg,  
Bettina Langhammer, Raffaele Piccolo, Eva Roost, Fabien Praz,  
Lorenz Räber MD, Marco Valgimigli, Peter Wenaweser, Peter Jüni,  
Thierry Carrel, Stephan Windecker and Stefan Stortecky

**SUPPLEMENTAL MATERIAL**

## **Supplemental Methods**

### **Study procedure**

The decision to perform TAVI was based on the Heart Team evaluation. The procedure was performed according to standardized protocols. Post-procedural care consisted of heart rhythm monitoring for at least 48 hours after intervention, laboratory tests and 12-lead electrocardiogram on daily basis, and echocardiography before discharge.

### **Data collection**

In-hospital complications were closely monitored until discharge. Active follow-up was scheduled at 30 days and 12 months. Patients were questioned about their health status, medication and the occurrence of adverse events. In case of hospital readmission (with a length stay of at least 1 day), patients were requested to provide medical documents including discharge letters, interventional and blood laboratory reports. In case detailed information was required, a formal query to the primary care physician was sent. A dedicated clinical event committee, involving cardiologists and cardiac surgeons, evaluated and adjudicated all suspected events according to the Valve Academic Research Consortium (VARC-2) criteria. All data were entered into a dedicated web-based database held at the Clinical Trials Unit Bern (Bern University Hospital, Switzerland).

**Supplemental Table 1. Procedural characteristics**

|                                              | All patients alive<br>at discharge | Hospital readmission within<br>one year |              | p-value |
|----------------------------------------------|------------------------------------|-----------------------------------------|--------------|---------|
|                                              |                                    | None                                    | Once or more |         |
|                                              | N = 868                            | N = 647                                 | N = 221      |         |
| Procedure time (min)                         | 68.3 ± 33.0                        | 68.5 ± 33.7                             | 67.7 ± 31.0  | 0.76    |
| Amount of contrast (ml)                      | 226.3 ± 96.3                       | 224.9 ± 96.6                            | 230.4 ± 95.4 | 0.47    |
| General anesthesia, n(%)                     | 286 (32.9%)                        | 220(34.0%)                              | 66(29.9%)    | 0.28    |
| <b>Access Route</b>                          |                                    |                                         |              | 0.78    |
| Femoral, n(%)                                | 708(81.6%)                         | 527(81.5%)                              | 181(81.9%)   | 0.92    |
| Apical, n(%)                                 | 148(17.1%)                         | 112(17.3%)                              | 36(16.3%)    | 0.76    |
| Subclavian, n(%)                             | 12(1.4%)                           | 8(1.2%)                                 | 4(1.8%)      | 0.51    |
| <b>Valve Type</b>                            |                                    |                                         |              | 0.99    |
| Medtronic CoreValve, n(%)                    | 405(47.5%)                         | 298(46.9%)                              | 107(49.1%)   | 0.58    |
| Edwards Sapien Valve XT, n(%)                | 351(41.1%)                         | 264(41.6%)                              | 87(39.9%)    | 0.69    |
| Symetis Acurate Valve, n(%)                  | 37(4.3%)                           | 28(4.4%)                                | 9(4.1%)      | 1.00    |
| SJM Portico, n(%)                            | 3(0.4%)                            | 2(0.3%)                                 | 1(0.5%)      | 1.00    |
| Edwards Sapien Valve 3, n(%)                 | 48(5.6%)                           | 36(5.7%)                                | 12(5.5%)     | 1.00    |
| BSC Lotus, n(%)                              | 9(1.1%)                            | 7(1.1%)                                 | 2(0.9%)      | 1.00    |
| <b>Procedural Specifications</b>             |                                    |                                         |              |         |
| Coronary Revascularization, n(%)             | 132(15.2%)                         | 104(16.1%)                              | 28(12.7%)    | 0.24    |
| Balloon valvuloplasty, n(%)                  | 786(90.8%)                         | 584(90.5%)                              | 202(91.4%)   | 0.79    |
| Post TAVI - Aortic Regurgitation 2 or 3      | 91(10.6%)                          | 67(10.5%)                               | 24(10.9%)    | 0.90    |
| Valve in series, n(%)                        | 14(1.6%)                           | 10(1.5%)                                | 4(1.8%)      | 0.76    |
| Need for Permanent Pacemaker ≤ 30 Days, n(%) | 190(21.9%)                         | 136(21.0%)                              | 54(24.4%)    | 0.30    |

Depicted are means ± SD with p-values from t-tests, or counts (%) with p-values from Fisher's or chi-square tests.

**Supplemental Table 2. Characteristics of hospital stay at the index procedure and in-hospital events**

|                                | Patients alive<br>at discharge<br>n=868 | Patients with 1-year readmission |                       | p-value |
|--------------------------------|-----------------------------------------|----------------------------------|-----------------------|---------|
|                                |                                         | None<br>n=647                    | Once or more<br>n=221 |         |
| Any PRBC transfusion           | 201(23.2)                               | 149(23)                          | 52(23.5)              | 0.93    |
| Length of hospital stay (days) | 7.7±4.5                                 | 7.5±4.0                          | 8.4±5.9               | 0.019   |
| Length of ICU stay (days)      | 0.4±1.5                                 | 0.3±1.0                          | 0.5±2.3               | 0.16    |
| Length of IMC stay (days)      | 2.9±2.2                                 | 2.8±2.1                          | 3.2±2.6               | 0.040   |
| Cerebrovascular Events         | 29(3.3)                                 | 18(2.8)                          | 11(5)                 | 0.13    |
| Disabling Stroke               | 21(2.4)                                 | 12(1.9)                          | 9(4.1)                | 0.076   |
| Myocardial infarction          | 4(0.5)                                  | 2(0.3)                           | 2(0.9)                | 0.27    |
| Bleeding                       | 266(30.6)                               | 199(30.8)                        | 67(30.3)              | 0.93    |
| Life-threatening               | 75(8.6)                                 | 52(8)                            | 23(10.4)              | 0.27    |
| Major                          | 149(17.2)                               | 115(17.8)                        | 34(15.4)              | 0.47    |
| Acute Kidney Injury            | 102(11.8)                               | 65(10.0)                         | 37(16.7)              | 0.011   |
| Access Site Complications      | 166(19.1)                               | 133(20.6)                        | 33(14.9)              | 0.074   |
| Major                          | 76(8.8)                                 | 60(9.3)                          | 16(7.2)               | 0.41    |
| Minor                          | 86(9.9)                                 | 71(11.0)                         | 15(6.8)               | 0.089   |
| Peak Troponin(µg/l)            | 0.79±7.70                               | 0.54±5.22                        | 1.53±12.3             | 0.064   |
| Peak Creatinine(µmol/l)        | 124.6±85.1                              | 118.1±76.3                       | 143.9±104.7           | <0.001  |
| BNP(pg/ml)                     | 488.3±865.1                             | 473.7±914.1                      | 533.0±694.1           | 0.012   |
| <b>Discharge medication</b>    |                                         |                                  |                       | 0.002   |
| ASA                            | 23(2.7)                                 | 17(2.6)                          | 6(2.7)                | 1.00    |
| Clopidogrel                    | 14(1.6)                                 | 12(1.9)                          | 2(0.9)                | 0.54    |
| OAC/NOAC                       | 44(5.1)                                 | 25(3.9)                          | 19(8.6)               | 0.012   |
| DAPT                           | 556(64.1)                               | 433(67)                          | 123(55.7)             | 0.003   |

Depicted are means ± SD with p-values from t-tests, or counts (%) with p-values from Fisher's or chi-square tests.

ASA, Acetylsalicylic acid; DAPT, Dual antiplatelet therapy; ICU, Intensive care unit; IMC, Intermediate care unit; NOAC, non-vitamin K antagonist oral anticoagulant; OAC, oral anticoagulant; PRBC, Packed red blood cells.

**Supplemental Table 3. Reasons for hospital readmission within one year after TAVI**

|                                         | All readmissions<br>N = 308 | Temporal sequence of readmissions |               |               |                      | p-value |
|-----------------------------------------|-----------------------------|-----------------------------------|---------------|---------------|----------------------|---------|
|                                         |                             | 1st<br>N = 221                    | 2nd<br>N = 55 | 3rd<br>N = 18 | 4th to 8th<br>N = 14 |         |
| <b>Reasons for Hospital Readmission</b> |                             |                                   |               |               |                      | 0.40    |
| Cardiovascular causes                   | 142(46%)                    | 101(46%)                          | 26(47%)       | 10(56%)       | 5(36%)               |         |
| Cancer                                  | 15(5%)                      | 12(5%)                            | 2(4%)         | 1(6%)         | 0(0%)                |         |
| Surgery                                 | 36(12%)                     | 23(10%)                           | 6(11%)        | 2(11%)        | 5(36%)               |         |
| Infectious Disease                      | 12(4%)                      | 8(4%)                             | 1(2%)         | 1(6%)         | 2(14%)               |         |
| Gastrointestinal Disease                | 30(10%)                     | 22(10%)                           | 7(13%)        | 0(0%)         | 1(7%)                |         |
| Respiratory Disease                     | 14(5%)                      | 9 (4%)                            | 3(5%)         | 2(11%)        | 0(0%)                |         |
| Kidney Disease                          | 8(3%)                       | 6 (3%)                            | 1(2%)         | 1(6%)         | 0(0%)                |         |
| Other                                   | 51(17%)                     | 40(18%)                           | 9(16%)        | 1(6%)         | 1 (7%)               |         |

Depicted are counts (% of all reasons; p-value from Chi-square tests).

| <b>Supplemental Table 4. Causes of hospital readmission classified as “Others”</b> |                           |
|------------------------------------------------------------------------------------|---------------------------|
| <b>Cause</b>                                                                       | <b>N. of readmissions</b> |
| Fall with/without related injury                                                   | 11                        |
| Immunological disorders                                                            | 6                         |
| Chronic pain                                                                       | 5                         |
| Hyponatremia                                                                       | 5                         |
| Depression or psychosis                                                            | 4                         |
| Percutaneous LAA closure                                                           | 3                         |
| Hyperglycemia                                                                      | 3                         |
| Pre-syncope                                                                        | 3                         |
| Neurological disease (Parkinson)                                                   | 2                         |
| Pressure ulcers                                                                    | 2                         |
| Obstructive sleep apnea                                                            | 2                         |
| Hypertensive emergency                                                             | 1                         |
| Cataract treatment                                                                 | 1                         |
| Fever of unknown origin                                                            | 1                         |
| Rhabdomyolysis                                                                     | 1                         |
| Overdose of oral anticoagulants                                                    | 1                         |

**Supplemental Table 5. Time to first hospital readmission since hospital discharge after TAVI**

|                          | Days from Discharge to Readmission |                   |                      |
|--------------------------|------------------------------------|-------------------|----------------------|
|                          | n                                  | Mean $\pm$ SD     | Median (25%-75% IQR) |
| Total                    | 221                                | 117.9 $\pm$ 109.5 | 70 (23-204)          |
| Cardiovascular causes    | 101                                | 105.4 $\pm$ 104.2 | 59 (25-190)          |
| Cancer                   | 12                                 | 105.8 $\pm$ 111.2 | 79 (4-167.5)         |
| Surgery                  | 23                                 | 180.7 $\pm$ 106.4 | 154 (86-279)         |
| Infectious disease       | 8                                  | 101.4 $\pm$ 110.8 | 58.5 (10.5-201)      |
| Gastrointestinal disease | 22                                 | 104.1 $\pm$ 109.0 | 66.5 (15-171)        |
| Respiratory disease      | 9                                  | 80.1 $\pm$ 104.8  | 38 (13-94)           |
| Kidney disease           | 6                                  | 171.7 $\pm$ 96.5  | 169.5 (96-202)       |
| Other                    | 40                                 | 128.4 $\pm$ 118.6 | 68 (22-231.5)        |

Depicted are sample sizes and means with standard deviations, medians with interquartile range IQR for the first rehospitalization.

**Supplemental Table 6. Days spent in hospital readmission within one year after TAVI**

| Readmissions             | Number of days |                          |                          |
|--------------------------|----------------|--------------------------|--------------------------|
|                          | N              | Average Days ( $\pm$ SD) | Median Days (25-75% IQR) |
| Readmission average      | 308            | 10.1 $\pm$ 11.0          | 7 (3-13)                 |
| First                    | 221            | 10.5 $\pm$ 12.0          | 7 (3-14)                 |
| Second                   | 55             | 8.8 $\pm$ 8.2            | 6 (3-11)                 |
| Third                    | 18             | 8.1 $\pm$ 6.8            | 6.5 (2-12)               |
| Fourth                   | 6              | 11.7 $\pm$ 7.3           | 11 (6-18)                |
| Fifth                    | 3              | 13.7 $\pm$ 11.0          | 19 (1-21)                |
| Sixth                    | 2              | 10.0 $\pm$ 2.8           | 10 (8-12)                |
| Seventh                  | 2              | 5.0 $\pm$ 2.8            | 5 (3-7)                  |
| Eight                    | 1              | 23                       | 23                       |
| Cumulative during 1 Year | 221            | 14.1 $\pm$ 15.5          | 9 (4-19)                 |

Depicted are average in-hospital times with standard deviations (days) and median days in-hospital times with 25% to 75% interquartile range. Discharged on the same day as re-admission counted as a in-hospital time of 0 days.



**Supplemental Table 7. Predictors of hospital readmission adding echocardiographic parameters measured after the procedure****Multivariate competing risk regression**

|                                      | SHR (95% CI)     | p-value |
|--------------------------------------|------------------|---------|
| <b>Any readmission*</b>              |                  |         |
| Mean transprosthetic gradient        | 0.98 (0.95-1.02) | 0.325   |
| Indexed aortic valve area            | 1.01 (0.34-2.98) | 0.989   |
| Left ventricular ejection fraction   | 1.00 (0.98-1.01) | 0.490   |
| Any aortic regurgitation             | 1.10 (0.71-1.68) | 0.671   |
| Moderate/severe mitral regurgitation | 1.14 (0.69-1.89) | 0.598   |
| <b>Cardiovascular readmission**</b>  |                  |         |
| Mean transprosthetic gradient        | 0.99 (0.94-1.04) | 0.626   |
| Indexed aortic valve area            | 0.61 (0.13-2.97) | 0.544   |
| Left ventricular ejection fraction   | 0.98 (0.97-1.00) | 0.026   |
| Any aortic regurgitation             | 1.15 (0.73-1.81) | 0.557   |
| Moderate/severe mitral regurgitation | 0.98 (0.47-2.01) | 0.948   |

**Supplemental Table 8. Clinical outcomes according to time of hospital readmission after TAVI**

|                                      | Not readmitted within 30 days after TAVI |            | Readmitted within 30 days after TAVI |            | Hazard Ratio (95% CI) | p-value |
|--------------------------------------|------------------------------------------|------------|--------------------------------------|------------|-----------------------|---------|
|                                      | At risk                                  | Events (%) | At risk                              | Events (%) |                       |         |
| Mortality                            | 801                                      | 84 (10.6)  | 45                                   | 11 (24.4)  | 2.62 (1.40-4.91)      | 0,003   |
| Cardiac mortality                    | 801                                      | 53 (6.8)   | 45                                   | 8 (18.5)   | 3.00 (1.43-6.31)      | 0,004   |
| Cerebrovascular accident             | 785                                      | 12 (1.6)   | 40                                   | 0 (0.0)    | 0.78 (0.05-12.94)     | 1,000   |
| Major stroke                         | 792                                      | 6 (0.8)    | 41                                   | 0 (0.0)    | 1.47 (0.08-25.65)     | 1,000   |
| Minor stroke                         | 795                                      | 1 (0.1)    | 45                                   | 0 (0.0)    | 5.83 (0.24-141.13)    | 1,000   |
| Transient ischemic attack            | 800                                      | 5 (0.7)    | 44                                   | 0 (0.0)    | 1.64 (0.09-29.19)     | 1,000   |
| Myocardial infarction                | 798                                      | 10 (1.3)   | 44                                   | 0 (0.0)    | 0.85 (0.05-14.27)     | 1,000   |
| Periprocedural myocardial infarction | 798                                      | 0 (0.0)    | 45                                   | 0 (0.0)    | -                     |         |
| Spontaneous myocardial infarction    | 801                                      | 10 (1.3)   | 44                                   | 0 (0.0)    | 0.86 (0.05-14.44)     | 1,000   |
| Acute kidney injury                  | 709                                      | 0 (0.0)    | 39                                   | 1 (2.6)    | 53.89 (2.23-1301.76)  | 0,052   |
| Stage 3                              | 779                                      | 0 (0.0)    | 42                                   | 1 (2.4)    | 55.02 (2.28-1330.59)  | 0,051   |
| Bleeding                             | 557                                      | 22 (4.2)   | 24                                   | 0 (0.0)    | 0.51 (0.03-8.16)      | 1,000   |
| Life threatening bleeding            | 733                                      | 13 (1.9)   | 37                                   | 0 (0.0)    | 0.72 (0.04-11.88)     | 1,000   |
| Major bleeding                       | 664                                      | 8 (1.3)    | 35                                   | 0 (0.0)    | 1.10 (0.06-18.68)     | 1,000   |
| Minor bleeding                       | 748                                      | 9 (1.3)    | 41                                   | 0 (0.0)    | 0.95 (0.06-16.04)     | 1,000   |
| Structural valve deterioration       | 800                                      | 3 (0.4)    | 44                                   | 0 (0.0)    | 2.57 (0.13-48.99)     | 1,000   |
| Repeat unplanned intervention        | 796                                      | 7 (0.9)    | 44                                   | 0 (0.0)    | 1.19 (0.07-20.51)     | 1,000   |
| Pacemaker implantation               | 632                                      | 14 (2.4)   | 28                                   | 1 (3.8)    | 1.64 (0.22-12.47)     | 0,633   |

Depicted are patients still at risk (at risk) for the specified event at 30 days and nr of events afterwards (% from life-table estimates) with p-values from Cox's Regressions (landmark at 30 days). Clinical outcomes only first event of each type counted per patient. (continuity corrected Risk ratios and Fisher's tests in case of zero events).

Supplemental Figure 1

Flow chart of patients included in the study

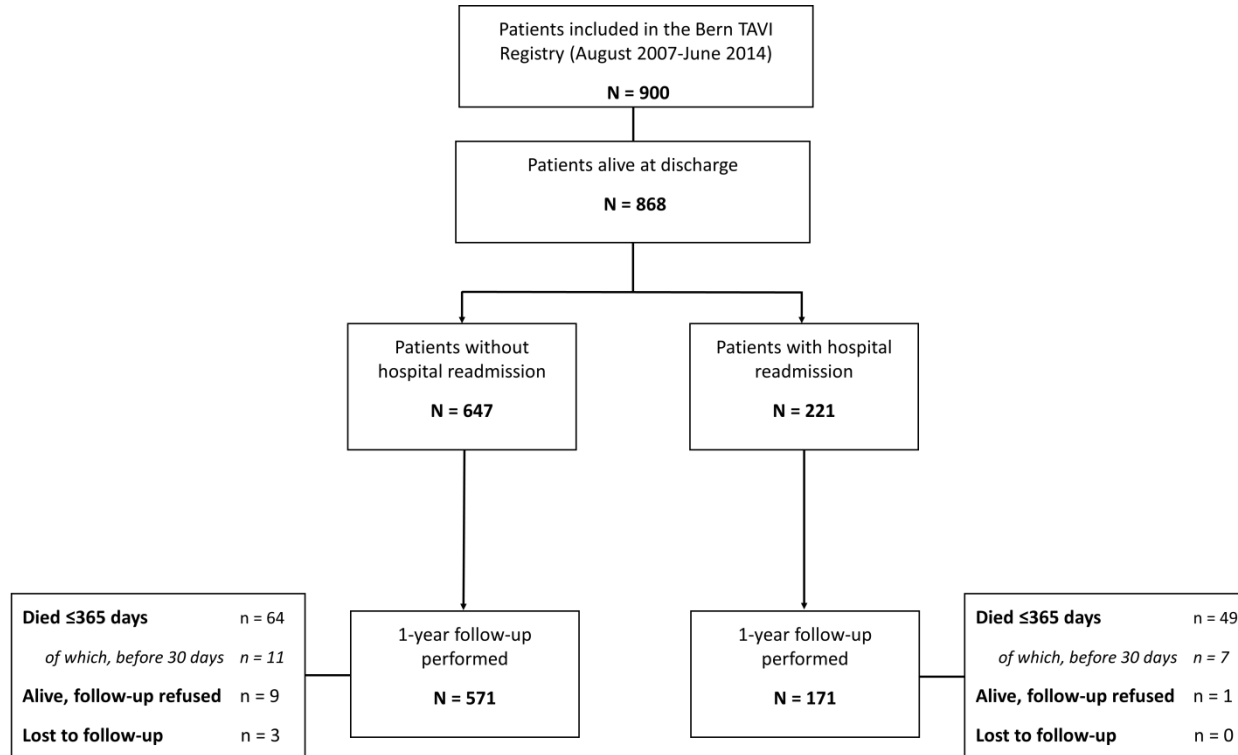

Supplement: eurheartj_38_28_2211_s1.pdf [file eurheartj_38_28_2211_s1.pdf]
